# Supplementary material for: A New Sensor for Methyl Paraben Using an Electrode Made of a Cellulose Nanocrystal–Reduced Graphene Oxide Nanocomposite
Source: PubMed Central journal article supplement (PMC6630541; doi:10.3390/s19122726), 2019-06-18
Supplement: sensors-19-02726-s001.pdf [file sensors-19-02726-s001.pdf]

# A New Sensor for Methyl Paraben Using an Electrode Made of a Cellulose Nanocrystal–Reduced Graphene Oxide Nanocomposite

Wan Elina Faradilla Wan Khalid <sup>1,2</sup>, Mohamad Nasir Mat Arip <sup>3</sup>, Latifah Jasmani<sup>3</sup> and Lee Yook Heng <sup>1,\*</sup>

<sup>1</sup> School of Chemical Sciences and Food Technology, Faculty of Science and Technology, Universiti Kebangsaan Malaysia, 43600 Bangi, Selangor, Malaysia; [wan\\_elina@uitm.edu.my](mailto:wan_elina@uitm.edu.my) (W.E.F.W.K.); [leeyookheng@yahoo.co.uk](mailto:leeyookheng@yahoo.co.uk) (L.Y.H.)

<sup>2</sup> Faculty of Applied Science, Universiti Teknologi MARA Negeri Sembilan, Kuala Pilah Campus, Pekan Parit Tinggi, 72000 Kuala Pilah, Negeri Sembilan Darul Khusus, Malaysia

<sup>3</sup> Forest Products Division, Forest Research Institute Malaysia, Selangor 52109, Malaysia; [mnasir@frim.gov.my](mailto:mnasir@frim.gov.my) (M.N.M.A.); [latifah@frim.gov.my](mailto:latifah@frim.gov.my) (L.J)

\* Correspondence: [leeyookheng@yahoo.co.uk](mailto:leeyookheng@yahoo.co.uk); Tel.: +603-89213356; Fax: +603-89215410

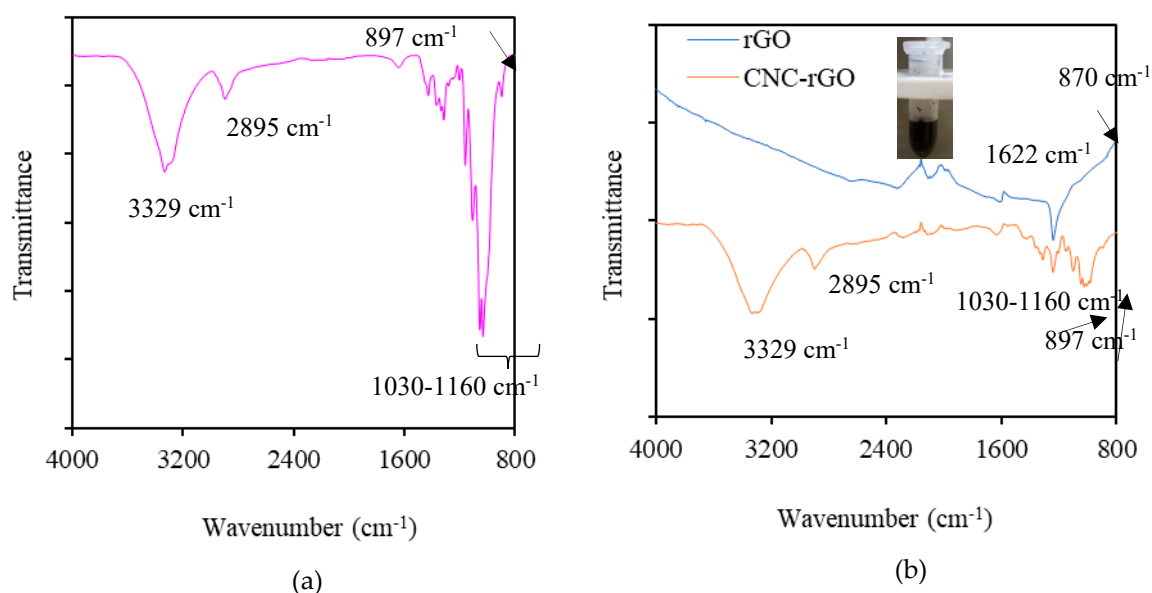

**Figure S1.** FTIR spectra for (a) CNC (b) rGO and CNC-rGO. Inset shows the CNC-rGO dispersion after sonication for 1 h.

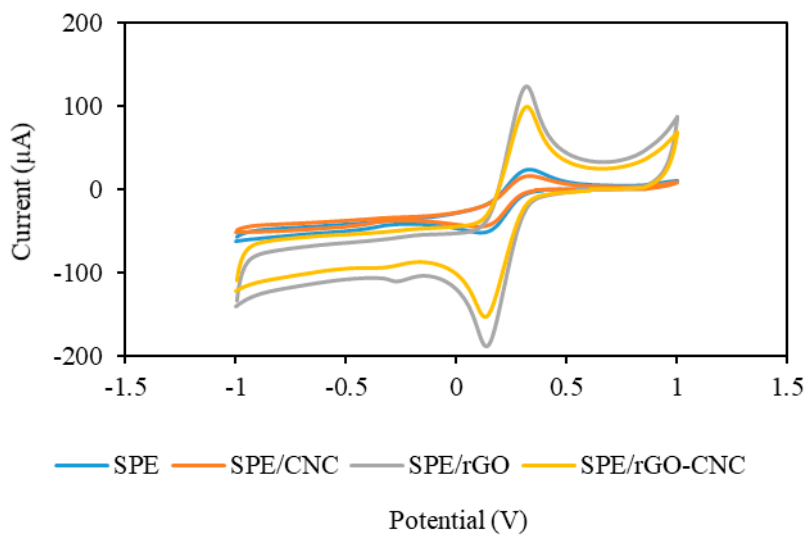

**Figure S2.** CV of different types of modified electrodes in 10 mM  $K_3Fe(CN)_6$  in 0.1 M KCl. Conditions: Scan rate 0.01 V/s, 0.05 M PBS pH 7.0.

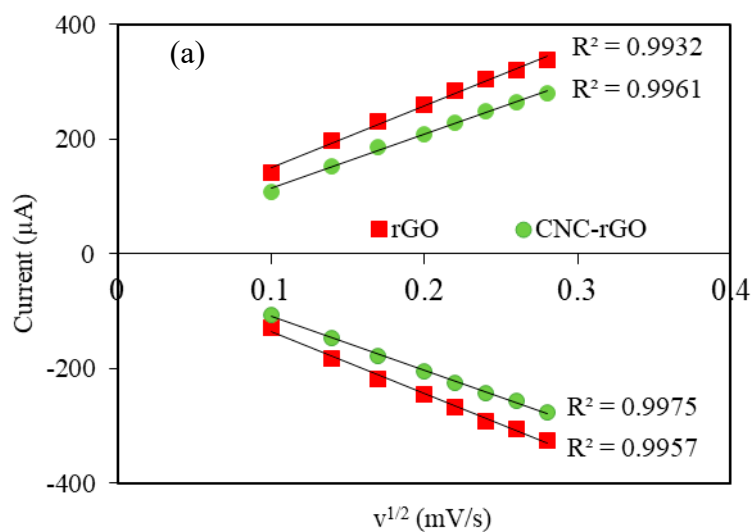

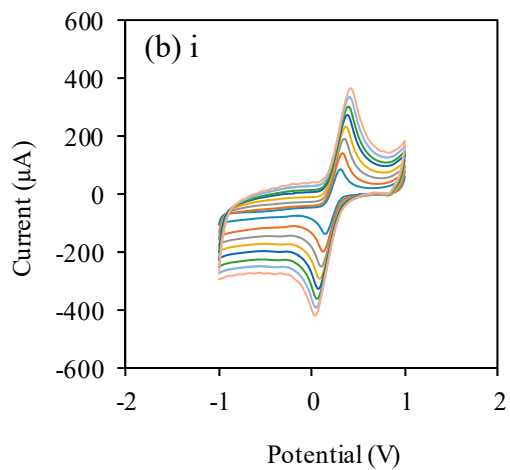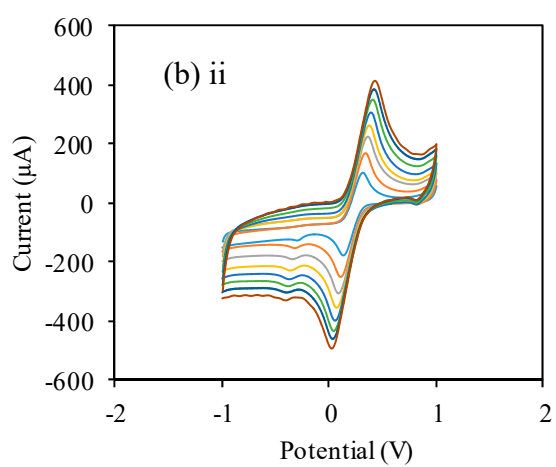

**Figure S3.** (a) Plot of current versus square root of the scan rate for rGO and CNC-rGO (b) CVs from the scan rate (0.01 – 0.08 V/s) for **b(i)** CNC-rGO **b(ii)** rGO in 10 mM  $K_3Fe(CN)_6$  in 0.1 M KCl.

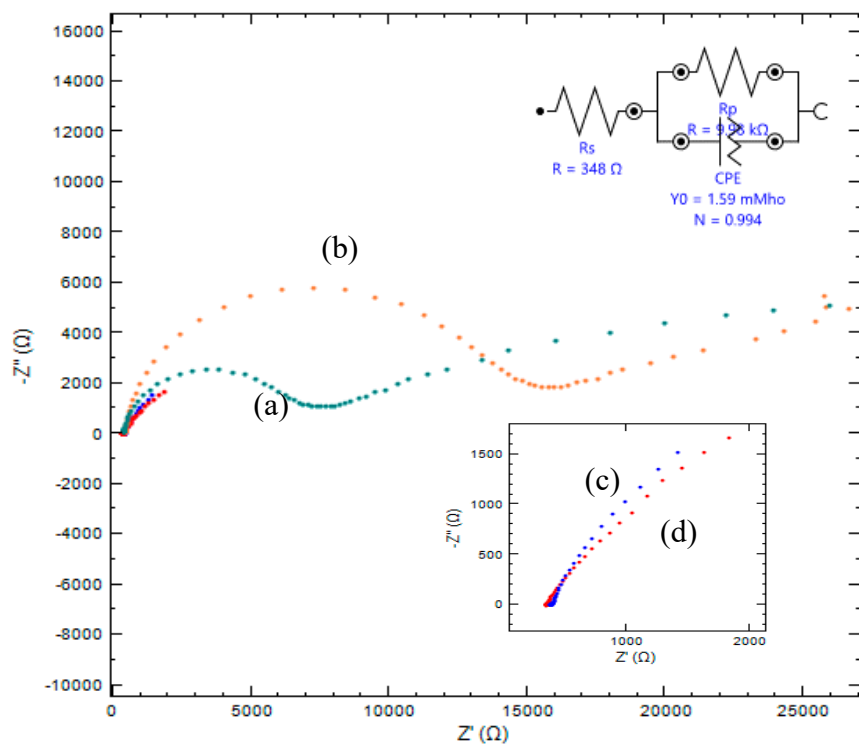

**Figure S4.** Nyquist plot for (a) bare SPE, (b) CNC, (c) rGO and (d) CNC-rGO modified SPE in 10 mM  $[\text{Fe}(\text{CN})_6]^{3-}/[\text{Fe}(\text{CN})_6]^{4-}$  solution in 0.1 M KCl. Inset: Equivalent circuit for CNC-rGO modified SPE.

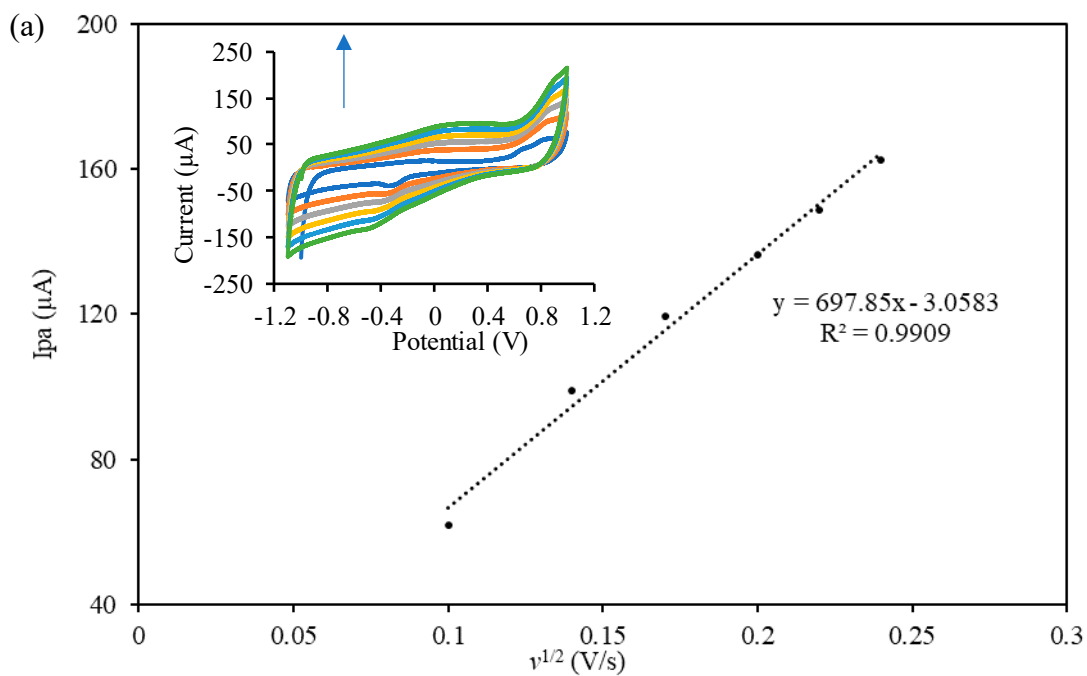

(b)

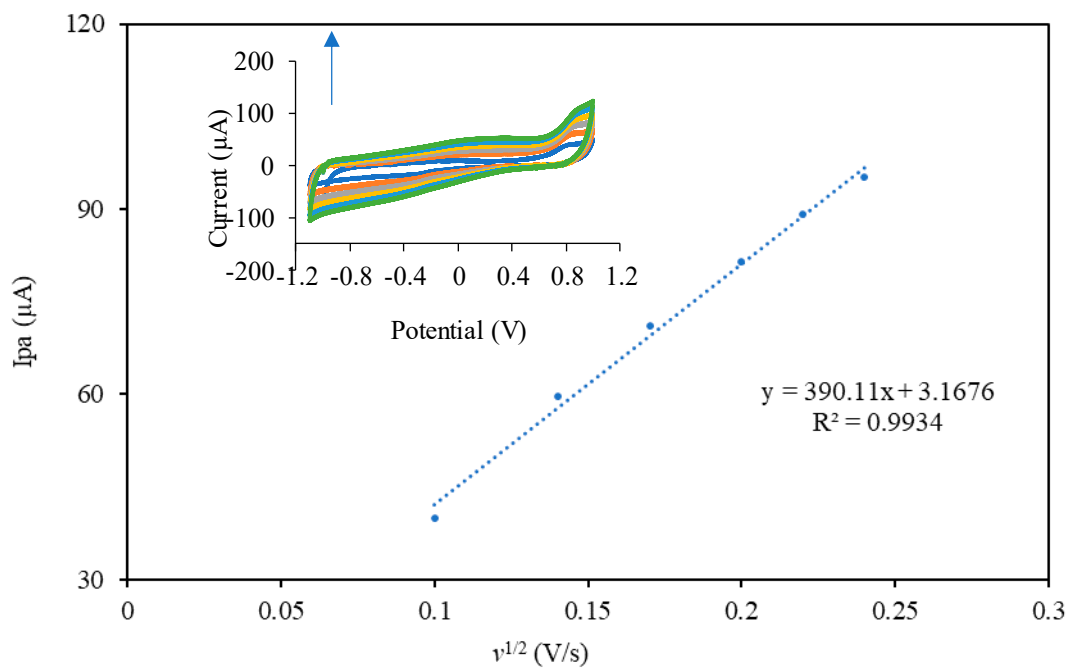

**Figure S5.** Plot anodic current versus square root of the scan rate for (a) rGO modified electrode (b) CNC-rGO nanocomposite. Inset shows the CV of the effect of scan rate.

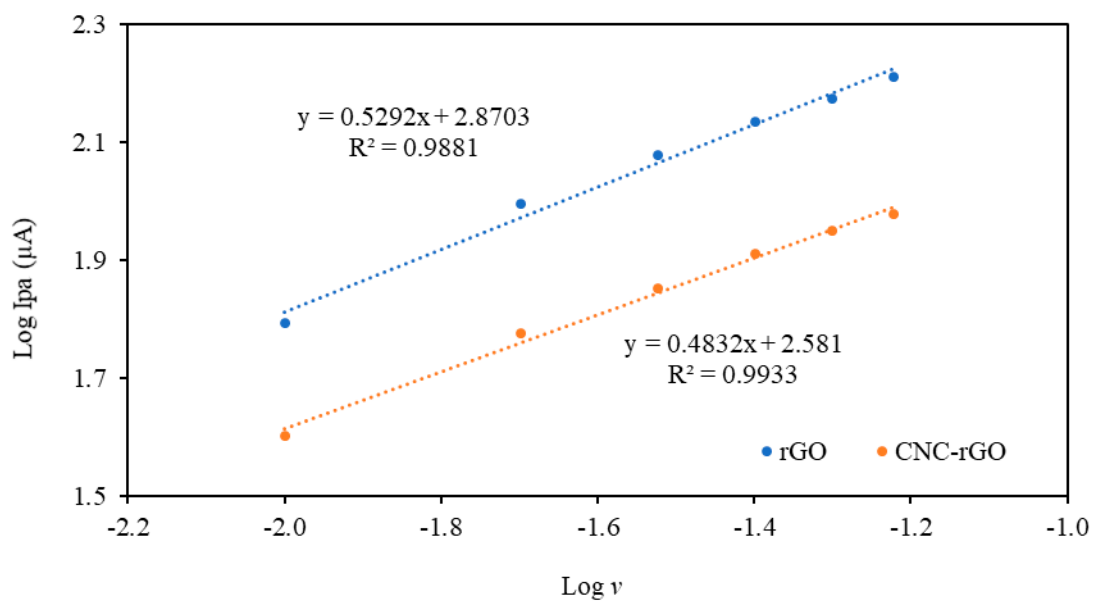

**Figure S6.** Plot of  $\log I_{pa}$  versus  $\log$  scan rate for rGO and CNC-rGO nanocomposite modified electrodes.

(a)

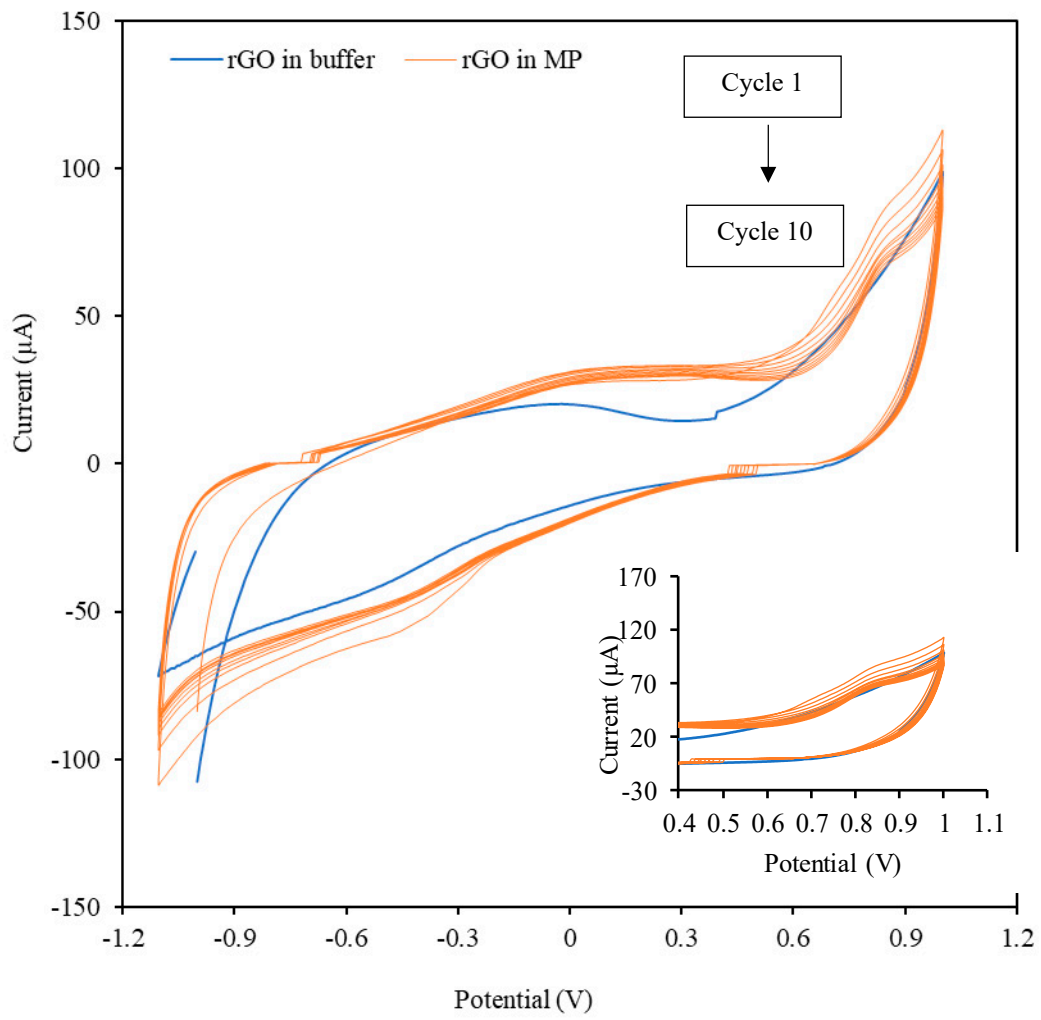

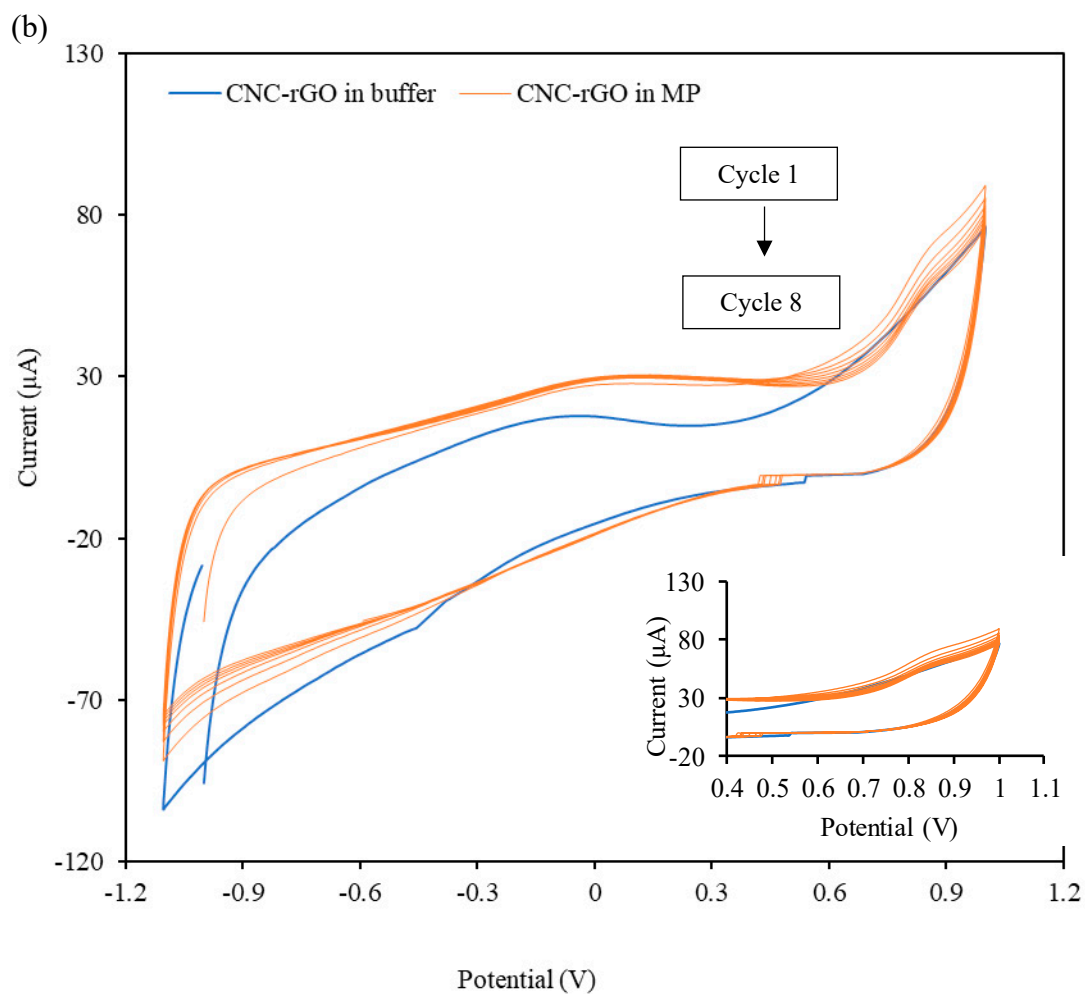

**Figure S7.** CV of the effect of cycles on (a) rGO and (b) CNC-rGO nanocomposite response in the presence of  $4 \times 10^{-4}$  M MP in K-phosphate buffer pH 7.0 (0.05 M).

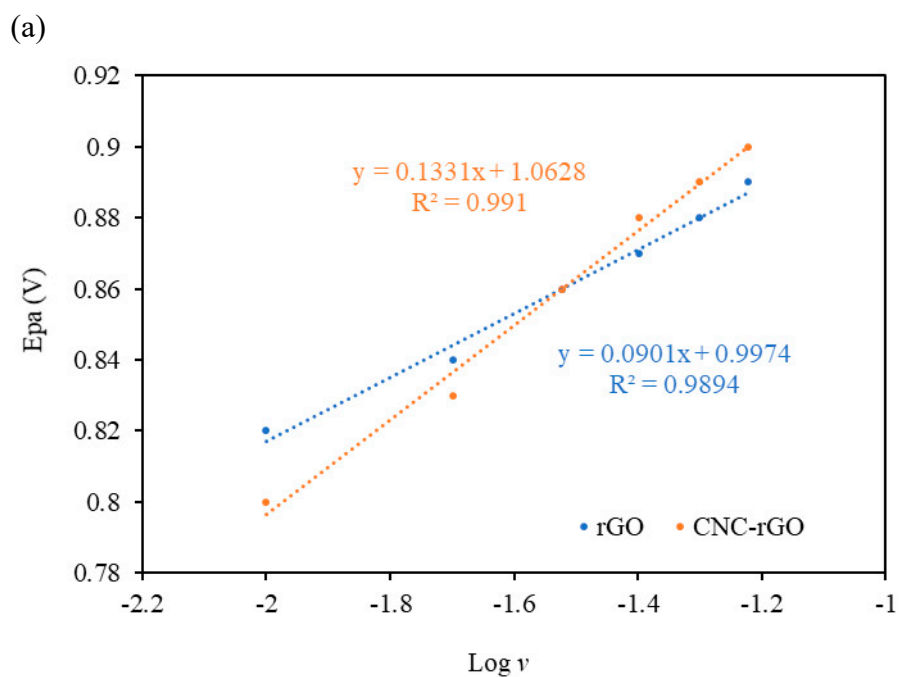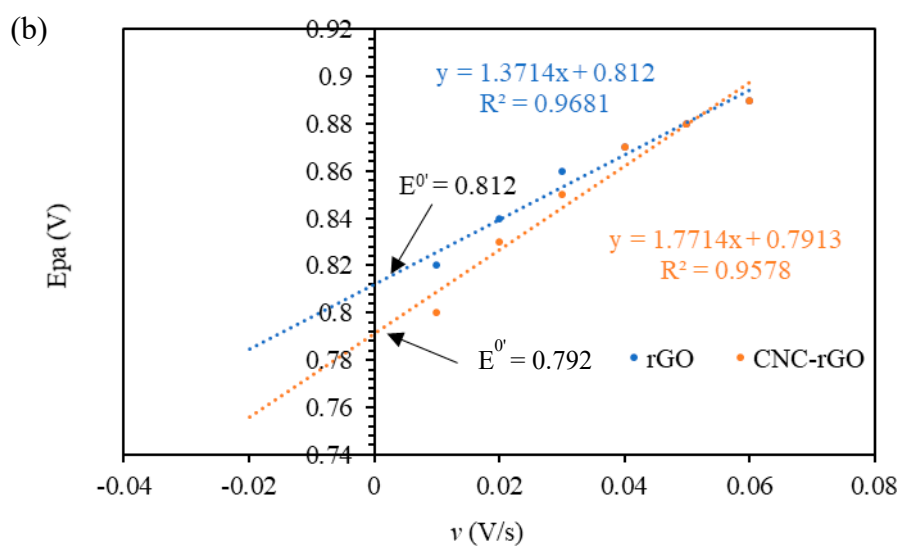

**Figure S8.** (a) Plot of Epa versus log scan rate and (b) Plot Epa versus scan rate with  $E^0$  value determination by extrapolating the plot to  $v = 0$  for rGO and CNC-rGO nanocomposite.



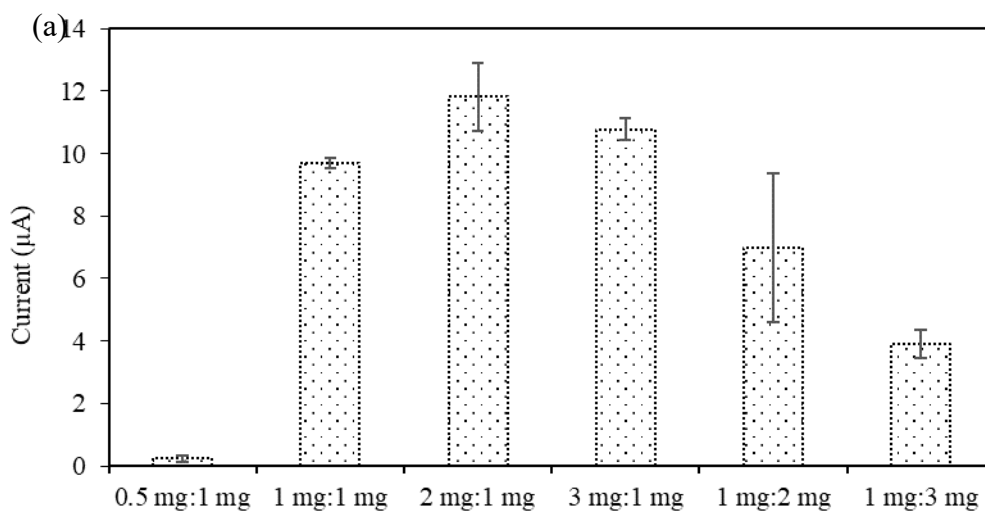

Ratio of CNC:rGO for nanocomposite preparation

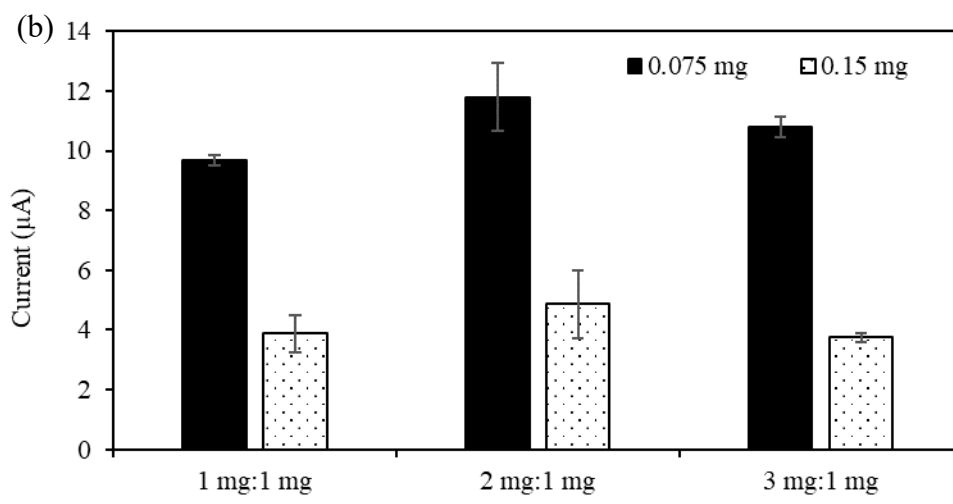

Amount of CNC-rGO dropped on carbon SPE

**Figure S9.** (a) Current response of different CNC:rGO weight ratio for CNC-rGO nanocomposite preparation (b) Response on the amount of CNC-rGO nanocomposite immobilized on the electrode surface using three different CNC to rGO ratios towards  $5 \times 10^{-3}$  M MP \*0.075 mg and 0.15 mg refer to amount of CNC-rGO that was dropped on the carbon SPE. Conditions: Scan rate 0.01 V/s; 0.05 M PBS pH 7.0.

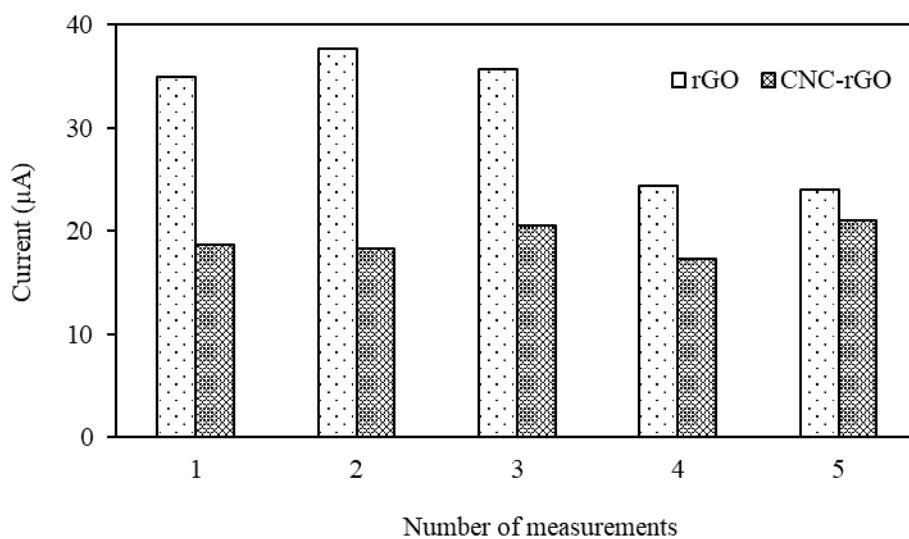

**Figure S10.** Reproducibility study of rGO and nanocomposite CNC-rGO modified electrodes in  $4 \times 10^{-4}$  M MP at 0.75 V.

**Table S1.** Electrochemical characterization of the modified electrodes in 10 mM  $K_3Fe(CN)_6$  in 0.1 M KCl.

| Electrodes  | $\Delta E_p$ (mV) | $I_{pa}$ ( $\mu A$ ) |
|-------------|-------------------|----------------------|
| Bare SPE    | 203               | 24.41                |
| SPE/CNC     | 217               | 16.09                |
| SPE/rGO     | 175               | 121.77               |
| SPE/rGO-CNC | 198               | 97.63                |

**Table S2.** The value for all the parameter in Laviron equation for rGO and CNC-rGO nanocomposite modified electrode.

| Parameters | rGO                        | CNC-rGO nanocomposite      |
|------------|----------------------------|----------------------------|
| $\alpha n$ | 0.6566                     | 0.4445                     |
| $k_0$      | $2.918 \times 10^3 s^{-1}$ | $1.872 \times 10^3 s^{-1}$ |
| $n$        | 1.65                       | 0.889                      |
| $E^0$      | 0.812 V                    | 0.792 V                    |

**Table S3.** Recovery study of MP spiked in Aloe Vera cream for burn sample.

| Sample | Added (M)          | Detected <sup>a</sup> (M) | Recovery (%)     |
|--------|--------------------|---------------------------|------------------|
| 1      | $3 \times 10^{-3}$ | $2.5 \times 10^{-3}$      | $83.3 \pm 0.21$  |
| 2      | $5 \times 10^{-3}$ | $5.3 \times 10^{-3}$      | $106.6 \pm 1.28$ |

<sup>a</sup> Number of measurement,  $n = 3$
